# Supplementary material for: Synthesis and characterization of cyano-substituted carborane-based compounds. Molecular structure of [1-(4-C7H7)-12-(C5H3-3-(CN)-3,4-(CH3)2)-C2B10H10]
Source: Royal Society of Chemistry journal article supplement (doi:10.1039/c1dt10726g), 2011-01-01
Supplement: c1dt10726g.pdf [file c1dt10726g.pdf]

**Polyhedral-based Nonlinear Optical Materials. Part IV.<sup>1</sup> Synthesis and Characterization of Cyano-Substituted Carborane-based Nonlinear Optical Precursor Compounds. Molecular Structure of [1-(4-C<sub>7</sub>H<sub>7</sub>)-12-(C<sub>5</sub>H<sub>3</sub>-3-(CN)-3,4-(CH<sub>3</sub>)<sub>2</sub>)-C<sub>2</sub>B<sub>10</sub>H<sub>10</sub>].**

Jesse Taylor, Wilda Vargas, Ana Torvisco, Karin Ruhlandt-Senge, and James T. Spencer\*  
Department of Chemistry, Syracuse University, Syracuse, New York 13244-4100 USA

## Supplemental Materials

The following crystal structure has been deposited at the Cambridge Crystallographic Data Centre and allocated the deposition number CCDC 667845  
Summary of Data CCDC 667845  
Authors: J.Taylor, W.Vargas, A.Torvisco, K.Ruhlandt-Senge, J.T.Spencer  
Journal: Inorg.Chem. (0009)  
Formula: C<sub>17</sub> H<sub>25</sub> B<sub>10</sub> N<sub>1</sub>  
Unit cell parameters: a 8.6794(17) b 11.021(2) c 43.175(9) beta 91.00(3), space group P21/n

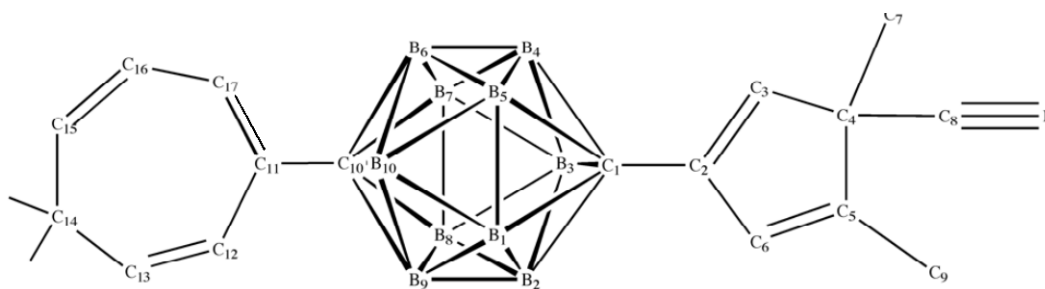

**Table 1.** Crystal data and structure refinement for **8**.

|                        |                                                   |                |
|------------------------|---------------------------------------------------|----------------|
| Identification code    | jesse2                                            |                |
| Empirical formula      | C <sub>17</sub> H <sub>25</sub> B <sub>10</sub> N |                |
| Formula weight         | 351.48                                            |                |
| Temperature            | 293(2) K                                          |                |
| Wavelength             | 0.71073 Å                                         |                |
| Crystal system         | Monoclinic                                        |                |
| Space group            | P2(1)/n                                           |                |
| Unit cell dimensions   | a = 8.6794(17) Å                                  | α = 90°.       |
|                        | b = 11.021(2) Å                                   | β = 91.00(3)°. |
|                        | c = 43.175(9) Å                                   | γ = 90°.       |
| Volume                 | 4129.2(14) Å <sup>3</sup>                         |                |
| Z                      | 8                                                 |                |
| Density (calculated)   | 1.131 Mg/m <sup>3</sup>                           |                |
| Absorption coefficient | 0.058 mm <sup>-1</sup>                            |                |

|                                   |                                             |
|-----------------------------------|---------------------------------------------|
| F(000)                            | 1472                                        |
| Crystal size                      | 0.50 x 0.20 x 0.20 mm <sup>3</sup>          |
| Theta range for data collection   | 1.89 to 24.00°.                             |
| Index ranges                      | -7<=h<=9, -11<=k<=12, -48<=l<=49            |
| Reflections collected             | 18794                                       |
| Independent reflections           | 6392 [R(int) = 0.0691]                      |
| Completeness to theta = 24.00°    | 98.7 %                                      |
| Absorption correction             | Semi-empirical from equivalents             |
| Max. and min. transmission        | 0.9886 and 0.9718                           |
| Refinement method                 | Full-matrix least-squares on F <sup>2</sup> |
| Data / restraints / parameters    | 6392 / 0 / 585                              |
| Goodness-of-fit on F <sup>2</sup> | 1.180                                       |
| Final R indices [I>2sigma(I)]     | R1 = 0.0729, wR2 = 0.1464                   |
| R indices (all data)              | R1 = 0.0933, wR2 = 0.1566                   |
| Largest diff. peak and hole       | 0.277 and -0.237 e.Å <sup>-3</sup>          |

#### References:

- Data Collection: SMART Software Reference Manual (1994). Siemens Analytical X-ray Instruments, 6300 Enterprise Dr., Madison, WI 53719-1173, USA.
- Data Reduction: SAINT Version 4 Software Reference Manual (1995). Siemens Analytical X-ray Instruments, 6300 Enterprise Dr., Madison, WI 53719-1173, USA.
- Structure Solution, Refinement and Graphics: G. M. Sheldrick (1994). SHELXTL Version 5 Reference Manual. Siemens Analytical X-ray Instruments, 6300 Enterprise Dr., Madison, WI 53719-1173, USA.
- Neutral atom scattering factors were taken from International Tables for Crystallography, Vol C, Tables 6.1.1.4, 4.2.6.8, and 4.2.4.2, Kluwer: Boston.
- Method of Absolute Structure Determination: H. D. Flack (1983). Acta Cryst. A39, 876-881.
- Polar Axis Restraints from: H. D. Flack and D. Schwarzenbach (1988). Acta Cryst. A44, 499-506.
- Absorption correction: Performed with SADABS (G.M.Sheldrick) using redundant data according to the method described by R.Blessing, Acta Cryst. (1995) A51 33-38.
- Acknowledgement: Please acknowledge funds from NSF(grant CHE-9527898), Syracuse University, and the W.M.Keck Foundation for the purchase of the X-ray instrument and computers.

**Table 2.** Atomic coordinates ( $\times 10^4$ ) and equivalent isotropic displacement parameters ( $\text{\AA}^2 \times 10^3$ ) for **8**.  $U(\text{eq})$  is defined as one third of the trace of the orthogonalized  $U^{ij}$  tensor.

|       | x        | y       | z       | U(eq) |
|-------|----------|---------|---------|-------|
| B(1)  | 1447(4)  | 959(3)  | 295(1)  | 29(1) |
| B(2)  | 2640(4)  | 1771(3) | 565(1)  | 29(1) |
| B(3)  | 2029(4)  | 3316(3) | 567(1)  | 27(1) |
| B(4)  | 464(4)   | 3467(3) | 296(1)  | 24(1) |
| B(5)  | 105(4)   | 2006(3) | 129(1)  | 27(1) |
| B(6)  | 1138(4)  | 3114(3) | -75(1)  | 27(1) |
| B(7)  | 2335(4)  | 3929(3) | 192(1)  | 27(1) |
| B(8)  | 3680(4)  | 2874(3) | 357(1)  | 28(1) |
| B(9)  | 3312(4)  | 1424(3) | 192(1)  | 30(1) |
| B(10) | 1753(4)  | 1568(3) | -79(1)  | 30(1) |
| C(1)  | 734(3)   | 2154(2) | 507(1)  | 23(1) |
| C(2)  | -395(3)  | 1876(2) | 758(1)  | 22(1) |
| C(3)  | -1928(3) | 1934(3) | 728(1)  | 33(1) |
| C(4)  | -2636(3) | 1513(3) | 1028(1) | 31(1) |
| C(5)  | -1255(3) | 1304(3) | 1238(1) | 32(1) |
| C(6)  | 23(4)    | 1475(3) | 1070(1) | 32(1) |
| C(7)  | -3595(4) | 342(3)  | 980(1)  | 39(1) |
| C(8)  | -3611(4) | 2486(3) | 1159(1) | 33(1) |
| C(9)  | -1397(4) | 941(3)  | 1566(1) | 44(1) |
| N(1)  | -4357(3) | 3235(3) | 1266(1) | 44(1) |
| C(10) | 3059(3)  | 2733(3) | -23(1)  | 24(1) |
| C(11) | 4179(3)  | 3018(3) | -282(1) | 29(1) |
| C(12) | 5644(4)  | 2393(3) | -277(1) | 51(1) |
| C(13) | 6361(5)  | 2054(4) | -531(1) | 75(2) |
| C(14) | 5834(5)  | 2282(4) | -845(1) | 66(1) |
| C(15) | 5750(4)  | 3594(4) | -898(1) | 48(1) |
| C(16) | 4817(4)  | 4293(3) | -738(1) | 40(1) |
| C(17) | 3865(3)  | 3905(3) | -486(1) | 32(1) |
| B(11) | 6430(4)  | 5937(3) | 2409(1) | 29(1) |
| B(12) | 6906(4)  | 7497(3) | 2440(1) | 27(1) |
| B(13) | 5599(4)  | 8327(3) | 2201(1) | 26(1) |

|       |          |         |         |       |
|-------|----------|---------|---------|-------|
| B(14) | 4825(4)  | 5801(3) | 2150(1) | 28(1) |
| B(15) | 4306(4)  | 7276(3) | 2019(1) | 28(1) |
| B(16) | 7470(4)  | 8008(3) | 2073(1) | 27(1) |
| B(17) | 7987(4)  | 6529(3) | 2201(1) | 28(1) |
| B(18) | 6703(4)  | 5477(3) | 2022(1) | 29(1) |
| B(19) | 5392(4)  | 6306(3) | 1782(1) | 28(1) |
| B(20) | 5876(4)  | 7878(3) | 1812(1) | 29(1) |
| C(18) | 5023(3)  | 7034(2) | 2390(1) | 20(1) |
| C(19) | 3978(3)  | 7162(2) | 2663(1) | 20(1) |
| C(20) | 2807(3)  | 6426(3) | 2736(1) | 25(1) |
| C(21) | 2027(3)  | 6922(2) | 3022(1) | 24(1) |
| C(22) | 3035(3)  | 8016(2) | 3109(1) | 24(1) |
| C(23) | 4106(3)  | 8138(3) | 2891(1) | 26(1) |
| C(24) | 336(3)   | 7299(3) | 2946(1) | 28(1) |
| C(25) | 2014(3)  | 6014(3) | 3274(1) | 26(1) |
| N(2)  | 1962(3)  | 5313(2) | 3471(1) | 36(1) |
| C(26) | 2778(3)  | 8778(3) | 3387(1) | 30(1) |
| C(27) | 7285(3)  | 6772(2) | 1832(1) | 22(1) |
| C(28) | 8380(3)  | 6638(3) | 1562(1) | 24(1) |
| C(29) | 8173(3)  | 5733(3) | 1355(1) | 30(1) |
| C(30) | 9175(3)  | 5430(3) | 1101(1) | 33(1) |
| C(31) | 9965(4)  | 6233(3) | 938(1)  | 34(1) |
| C(32) | 9761(4)  | 7556(3) | 988(1)  | 44(1) |
| C(33) | 10387(4) | 7842(3) | 1304(1) | 49(1) |
| C(34) | 9723(4)  | 7425(3) | 1562(1) | 37(1) |

---

**Table 3.** Bond lengths [Å] for **8**.

|            |          |              |          |
|------------|----------|--------------|----------|
| B(1)-C(1)  | 1.727(4) | B(8)-H(8)    | 1.10(3)  |
| B(1)-B(9)  | 1.762(5) | B(9)-C(10)   | 1.726(4) |
| B(1)-B(10) | 1.770(5) | B(9)-B(10)   | 1.778(5) |
| B(1)-B(5)  | 1.780(5) | B(9)-H(9)    | 1.06(3)  |
| B(1)-B(2)  | 1.786(5) | B(10)-C(10)  | 1.727(4) |
| B(1)-H(1)  | 1.10(3)  | B(10)-H(10)  | 1.08(3)  |
| B(2)-C(1)  | 1.721(4) | C(1)-C(2)    | 1.502(4) |
| B(2)-B(9)  | 1.765(5) | C(2)-C(3)    | 1.336(4) |
| B(2)-B(8)  | 1.767(5) | C(2)-C(6)    | 1.458(4) |
| B(2)-B(3)  | 1.783(5) | C(3)-C(4)    | 1.517(4) |
| B(2)-H(2)  | 1.07(3)  | C(3)-H(3A)   | 0.9300   |
| B(3)-C(1)  | 1.719(4) | C(4)-C(8)    | 1.485(4) |
| B(3)-B(8)  | 1.776(4) | C(4)-C(5)    | 1.506(4) |
| B(3)-B(7)  | 1.777(5) | C(4)-C(7)    | 1.547(4) |
| B(3)-B(4)  | 1.783(5) | C(5)-C(6)    | 1.349(4) |
| B(3)-H(3)  | 1.09(3)  | C(5)-C(9)    | 1.482(4) |
| B(4)-C(1)  | 1.724(4) | C(6)-H(6A)   | 0.9300   |
| B(4)-B(6)  | 1.758(4) | C(7)-H(7A)   | 0.9600   |
| B(4)-B(7)  | 1.767(5) | C(7)-H(7B)   | 0.9600   |
| B(4)-B(5)  | 1.789(5) | C(7)-H(7C)   | 0.9600   |
| B(4)-H(4)  | 1.11(3)  | C(8)-N(1)    | 1.149(4) |
| B(5)-C(1)  | 1.720(4) | C(9)-H(9A)   | 0.9600   |
| B(5)-B(6)  | 1.759(5) | C(9)-H(9B)   | 0.9600   |
| B(5)-B(10) | 1.769(4) | C(9)-H(9C)   | 0.9600   |
| B(5)-H(5)  | 1.08(3)  | C(10)-C(11)  | 1.527(4) |
| B(6)-C(10) | 1.730(4) | C(11)-C(17)  | 1.342(4) |
| B(6)-B(7)  | 1.781(5) | C(11)-C(12)  | 1.446(4) |
| B(6)-B(10) | 1.785(5) | C(12)-C(13)  | 1.323(5) |
| B(6)-H(6)  | 1.04(3)  | C(12)-H(12A) | 0.9300   |
| B(7)-C(10) | 1.737(4) | C(13)-C(14)  | 1.445(6) |
| B(7)-B(8)  | 1.787(5) | C(13)-H(13A) | 0.9300   |
| B(7)-H(7)  | 1.08(3)  | C(14)-C(15)  | 1.466(5) |
| B(8)-C(10) | 1.725(4) | C(14)-H(14A) | 0.9700   |
| B(8)-B(9)  | 1.777(5) | C(14)-H(14B) | 0.9700   |

|              |          |              |          |
|--------------|----------|--------------|----------|
| C(15)-C(16)  | 1.322(5) | B(17)-H(17)  | 1.10(3)  |
| C(15)-H(15A) | 0.9300   | B(18)-C(27)  | 1.725(4) |
| C(16)-C(17)  | 1.441(4) | B(18)-B(19)  | 1.778(5) |
| C(16)-H(16A) | 0.9300   | B(18)-H(18)  | 1.12(3)  |
| C(17)-H(17A) | 0.9300   | B(19)-C(27)  | 1.732(4) |
| B(11)-C(18)  | 1.719(4) | B(19)-B(20)  | 1.786(5) |
| B(11)-B(17)  | 1.763(5) | B(19)-H(19)  | 1.11(3)  |
| B(11)-B(18)  | 1.769(5) | B(20)-C(27)  | 1.727(4) |
| B(11)-B(12)  | 1.773(5) | B(20)-H(20)  | 1.10(3)  |
| B(11)-B(14)  | 1.778(5) | C(18)-C(19)  | 1.504(4) |
| B(11)-H(11)  | 1.08(3)  | C(19)-C(20)  | 1.343(4) |
| B(12)-C(18)  | 1.723(4) | C(19)-C(23)  | 1.463(4) |
| B(12)-B(16)  | 1.759(5) | C(20)-C(21)  | 1.519(4) |
| B(12)-B(17)  | 1.765(5) | C(20)-H(20A) | 0.9300   |
| B(12)-B(13)  | 1.775(5) | C(21)-C(25)  | 1.481(4) |
| B(12)-H(12)  | 1.06(3)  | C(21)-C(22)  | 1.534(4) |
| B(13)-C(18)  | 1.722(4) | C(21)-C(24)  | 1.554(4) |
| B(13)-B(16)  | 1.759(5) | C(22)-C(23)  | 1.341(4) |
| B(13)-B(20)  | 1.771(5) | C(22)-C(26)  | 1.483(4) |
| B(13)-B(15)  | 1.785(5) | C(23)-H(23A) | 0.9300   |
| B(13)-H(13)  | 1.11(3)  | C(24)-H(24A) | 0.9600   |
| B(14)-C(18)  | 1.717(4) | C(24)-H(24B) | 0.9600   |
| B(14)-B(19)  | 1.764(4) | C(24)-H(24C) | 0.9600   |
| B(14)-B(18)  | 1.767(5) | C(25)-N(2)   | 1.150(4) |
| B(14)-B(15)  | 1.777(5) | C(26)-H(26A) | 0.9600   |
| B(14)-H(14)  | 1.09(3)  | C(26)-H(26B) | 0.9600   |
| B(15)-C(18)  | 1.731(4) | C(26)-H(26C) | 0.9600   |
| B(15)-B(19)  | 1.764(5) | C(27)-C(28)  | 1.524(4) |
| B(15)-B(20)  | 1.772(5) | C(28)-C(29)  | 1.349(4) |
| B(15)-H(15)  | 1.11(3)  | C(28)-C(34)  | 1.453(4) |
| B(16)-C(27)  | 1.719(4) | C(29)-C(30)  | 1.450(4) |
| B(16)-B(20)  | 1.775(5) | C(29)-H(29A) | 0.9300   |
| B(16)-B(17)  | 1.776(5) | C(30)-C(31)  | 1.330(4) |
| B(16)-H(16)  | 1.10(3)  | C(30)-H(30A) | 0.9300   |
| B(17)-C(27)  | 1.716(4) | C(31)-C(32)  | 1.485(5) |
| B(17)-B(18)  | 1.777(5) | C(31)-H(31A) | 0.9300   |

|              |          |              |          |
|--------------|----------|--------------|----------|
| C(32)-C(33)  | 1.493(5) | C(33)-C(34)  | 1.345(4) |
| C(32)-H(32A) | 0.9700   | C(33)-H(33A) | 0.9300   |
| C(32)-H(32B) | 0.9700   | C(34)-H(34A) | 0.9300   |

---

Symmetry transformations used to generate equivalent atoms.

**Table 4.** Bond angles [°] for **8**.

|                 |           |                 |           |
|-----------------|-----------|-----------------|-----------|
| C(1)-B(1)-B(9)  | 104.6(2)  | B(8)-B(3)-B(4)  | 107.7(2)  |
| C(1)-B(1)-B(10) | 104.8(2)  | B(7)-B(3)-B(4)  | 59.52(19) |
| B(9)-B(1)-B(10) | 60.45(19) | C(1)-B(3)-B(2)  | 58.84(18) |
| C(1)-B(1)-B(5)  | 58.72(17) | B(8)-B(3)-B(2)  | 59.53(19) |
| B(9)-B(1)-B(5)  | 107.9(2)  | B(7)-B(3)-B(2)  | 108.1(2)  |
| B(10)-B(1)-B(5) | 59.76(19) | B(4)-B(3)-B(2)  | 108.1(2)  |
| C(1)-B(1)-B(2)  | 58.66(18) | C(1)-B(3)-H(3)  | 118.4(14) |
| B(9)-B(1)-B(2)  | 59.65(19) | B(8)-B(3)-H(3)  | 126.4(14) |
| B(10)-B(1)-B(2) | 108.1(2)  | B(7)-B(3)-H(3)  | 128.1(14) |
| B(5)-B(1)-B(2)  | 107.8(2)  | B(4)-B(3)-H(3)  | 120.9(14) |
| C(1)-B(1)-H(1)  | 118.7(15) | B(2)-B(3)-H(3)  | 118.0(14) |
| B(9)-B(1)-H(1)  | 127.3(15) | C(1)-B(4)-B(6)  | 104.5(2)  |
| B(10)-B(1)-H(1) | 126.8(15) | C(1)-B(4)-B(7)  | 105.0(2)  |
| B(5)-B(1)-H(1)  | 119.3(15) | B(6)-B(4)-B(7)  | 60.68(19) |
| B(2)-B(1)-H(1)  | 119.8(15) | C(1)-B(4)-B(3)  | 58.68(17) |
| C(1)-B(2)-B(9)  | 104.7(2)  | B(6)-B(4)-B(3)  | 108.3(2)  |
| C(1)-B(2)-B(8)  | 104.8(2)  | B(7)-B(4)-B(3)  | 60.08(18) |
| B(9)-B(2)-B(8)  | 60.43(19) | C(1)-B(4)-B(5)  | 58.59(17) |
| C(1)-B(2)-B(3)  | 58.72(17) | B(6)-B(4)-B(5)  | 59.46(18) |
| B(9)-B(2)-B(3)  | 108.3(2)  | B(7)-B(4)-B(5)  | 108.1(2)  |
| B(8)-B(2)-B(3)  | 60.02(19) | B(3)-B(4)-B(5)  | 107.7(2)  |
| C(1)-B(2)-B(1)  | 58.95(18) | C(1)-B(4)-H(4)  | 119.8(14) |
| B(9)-B(2)-B(1)  | 59.5(2)   | B(6)-B(4)-H(4)  | 126.3(14) |
| B(8)-B(2)-B(1)  | 108.0(2)  | B(7)-B(4)-H(4)  | 125.9(14) |
| B(3)-B(2)-B(1)  | 108.2(2)  | B(3)-B(4)-H(4)  | 119.7(14) |
| C(1)-B(2)-H(2)  | 122.6(15) | B(5)-B(4)-H(4)  | 120.2(14) |
| B(9)-B(2)-H(2)  | 123.9(16) | C(1)-B(5)-B(6)  | 104.7(2)  |
| B(8)-B(2)-H(2)  | 124.0(16) | C(1)-B(5)-B(10) | 105.2(2)  |
| B(3)-B(2)-H(2)  | 120.9(16) | B(6)-B(5)-B(10) | 60.79(19) |
| B(1)-B(2)-H(2)  | 120.6(16) | C(1)-B(5)-B(1)  | 59.08(18) |
| C(1)-B(3)-B(8)  | 104.5(2)  | B(6)-B(5)-B(1)  | 108.3(2)  |
| C(1)-B(3)-B(7)  | 104.8(2)  | B(10)-B(5)-B(1) | 59.84(19) |
| B(8)-B(3)-B(7)  | 60.41(19) | C(1)-B(5)-B(4)  | 58.81(17) |
| C(1)-B(3)-B(4)  | 58.95(17) | B(6)-B(5)-B(4)  | 59.38(18) |



|                  |           |                  |           |
|------------------|-----------|------------------|-----------|
| B(10)-B(5)-B(4)  | 108.3(2)  | B(8)-B(7)-H(7)   | 118.4(15) |
| B(1)-B(5)-B(4)   | 108.3(2)  | C(10)-B(8)-B(2)  | 105.5(2)  |
| C(1)-B(5)-H(5)   | 122.0(15) | C(10)-B(8)-B(3)  | 105.5(2)  |
| B(6)-B(5)-H(5)   | 124.4(16) | B(2)-B(8)-B(3)   | 60.45(18) |
| B(10)-B(5)-H(5)  | 124.0(15) | C(10)-B(8)-B(9)  | 59.02(18) |
| B(1)-B(5)-H(5)   | 120.4(16) | B(2)-B(8)-B(9)   | 59.72(19) |
| B(4)-B(5)-H(5)   | 120.8(16) | B(3)-B(8)-B(9)   | 108.1(2)  |
| C(10)-B(6)-B(4)  | 105.8(2)  | C(10)-B(8)-B(7)  | 59.22(18) |
| C(10)-B(6)-B(5)  | 105.4(2)  | B(2)-B(8)-B(7)   | 108.3(2)  |
| B(4)-B(6)-B(5)   | 61.16(19) | B(3)-B(8)-B(7)   | 59.84(18) |
| C(10)-B(6)-B(7)  | 59.28(18) | B(9)-B(8)-B(7)   | 108.2(2)  |
| B(4)-B(6)-B(7)   | 59.92(18) | C(10)-B(8)-H(8)  | 119.7(15) |
| B(5)-B(6)-B(7)   | 108.9(2)  | B(2)-B(8)-H(8)   | 125.4(15) |
| C(10)-B(6)-B(10) | 58.83(18) | B(3)-B(8)-H(8)   | 125.7(15) |
| B(4)-B(6)-B(10)  | 109.0(2)  | B(9)-B(8)-H(8)   | 119.9(15) |
| B(5)-B(6)-B(10)  | 59.87(19) | B(7)-B(8)-H(8)   | 120.1(15) |
| B(7)-B(6)-B(10)  | 108.5(2)  | C(10)-B(9)-B(1)  | 105.7(2)  |
| C(10)-B(6)-H(6)  | 120.0(15) | C(10)-B(9)-B(2)  | 105.5(2)  |
| B(4)-B(6)-H(6)   | 125.3(15) | B(1)-B(9)-B(2)   | 60.9(2)   |
| B(5)-B(6)-H(6)   | 124.8(15) | C(10)-B(9)-B(8)  | 59.00(18) |
| B(7)-B(6)-H(6)   | 120.3(15) | B(1)-B(9)-B(8)   | 108.6(2)  |
| B(10)-B(6)-H(6)  | 119.3(15) | B(2)-B(9)-B(8)   | 59.85(19) |
| C(10)-B(7)-B(4)  | 105.1(2)  | C(10)-B(9)-B(10) | 59.03(18) |
| C(10)-B(7)-B(3)  | 105.0(2)  | B(1)-B(9)-B(10)  | 60.0(2)   |
| B(4)-B(7)-B(3)   | 60.40(18) | B(2)-B(9)-B(10)  | 108.7(2)  |
| C(10)-B(7)-B(6)  | 58.90(17) | B(8)-B(9)-B(10)  | 108.3(2)  |
| B(4)-B(7)-B(6)   | 59.40(18) | C(10)-B(9)-H(9)  | 119.9(15) |
| B(3)-B(7)-B(6)   | 107.5(2)  | B(1)-B(9)-H(9)   | 125.8(15) |
| C(10)-B(7)-B(8)  | 58.61(18) | B(2)-B(9)-H(9)   | 124.5(15) |
| B(4)-B(7)-B(8)   | 107.9(2)  | B(8)-B(9)-H(9)   | 119.0(15) |
| B(3)-B(7)-B(8)   | 59.75(18) | B(10)-B(9)-H(9)  | 120.9(15) |
| B(6)-B(7)-B(8)   | 107.4(2)  | C(10)-B(10)-B(5) | 105.1(2)  |
| C(10)-B(7)-H(7)  | 118.3(15) | C(10)-B(10)-B(1) | 105.3(2)  |
| B(4)-B(7)-H(7)   | 127.9(15) | B(5)-B(10)-B(1)  | 60.40(19) |
| B(3)-B(7)-H(7)   | 126.1(15) | C(10)-B(10)-B(9) | 58.98(18) |
| B(6)-B(7)-H(7)   | 121.3(15) | B(5)-B(10)-B(9)  | 107.7(2)  |

|                   |           |                   |           |
|-------------------|-----------|-------------------|-----------|
| B(1)-B(10)-B(9)   | 59.5(2)   | C(3)-C(4)-C(7)    | 111.5(3)  |
| C(10)-B(10)-B(6)  | 58.98(18) | C(6)-C(5)-C(9)    | 129.4(3)  |
| B(5)-B(10)-B(6)   | 59.34(19) | C(6)-C(5)-C(4)    | 108.0(3)  |
| B(1)-B(10)-B(6)   | 107.6(2)  | C(9)-C(5)-C(4)    | 122.5(3)  |
| B(9)-B(10)-B(6)   | 107.6(2)  | C(5)-C(6)-C(2)    | 110.2(3)  |
| C(10)-B(10)-H(10) | 118.8(14) | C(5)-C(6)-H(6A)   | 124.9     |
| B(5)-B(10)-H(10)  | 127.2(14) | C(2)-C(6)-H(6A)   | 124.9     |
| B(1)-B(10)-H(10)  | 126.0(14) | C(4)-C(7)-H(7A)   | 109.5     |
| B(9)-B(10)-H(10)  | 119.2(14) | C(4)-C(7)-H(7B)   | 109.5     |
| B(6)-B(10)-H(10)  | 120.9(14) | H(7A)-C(7)-H(7B)  | 109.5     |
| C(2)-C(1)-B(3)    | 118.5(2)  | C(4)-C(7)-H(7C)   | 109.5     |
| C(2)-C(1)-B(5)    | 117.5(2)  | H(7A)-C(7)-H(7C)  | 109.5     |
| B(3)-C(1)-B(5)    | 114.1(2)  | H(7B)-C(7)-H(7C)  | 109.5     |
| C(2)-C(1)-B(2)    | 118.9(2)  | N(1)-C(8)-C(4)    | 178.8(3)  |
| B(3)-C(1)-B(2)    | 62.45(19) | C(5)-C(9)-H(9A)   | 109.5     |
| B(5)-C(1)-B(2)    | 113.7(2)  | C(5)-C(9)-H(9B)   | 109.5     |
| C(2)-C(1)-B(4)    | 117.9(2)  | H(9A)-C(9)-H(9B)  | 109.5     |
| B(3)-C(1)-B(4)    | 62.37(18) | C(5)-C(9)-H(9C)   | 109.5     |
| B(5)-C(1)-B(4)    | 62.60(18) | H(9A)-C(9)-H(9C)  | 109.5     |
| B(2)-C(1)-B(4)    | 113.8(2)  | H(9B)-C(9)-H(9C)  | 109.5     |
| C(2)-C(1)-B(1)    | 118.1(2)  | C(11)-C(10)-B(8)  | 119.1(2)  |
| B(3)-C(1)-B(1)    | 114.1(2)  | C(11)-C(10)-B(9)  | 119.2(2)  |
| B(5)-C(1)-B(1)    | 62.21(19) | B(8)-C(10)-B(9)   | 61.98(19) |
| B(2)-C(1)-B(1)    | 62.40(19) | C(11)-C(10)-B(10) | 118.4(2)  |
| B(4)-C(1)-B(1)    | 113.9(2)  | B(8)-C(10)-B(10)  | 113.1(2)  |
| C(3)-C(2)-C(6)    | 109.5(2)  | B(9)-C(10)-B(10)  | 61.99(19) |
| C(3)-C(2)-C(1)    | 125.6(3)  | C(11)-C(10)-B(6)  | 118.7(2)  |
| C(6)-C(2)-C(1)    | 124.8(2)  | B(8)-C(10)-B(6)   | 112.6(2)  |
| C(2)-C(3)-C(4)    | 108.8(3)  | B(9)-C(10)-B(6)   | 112.6(2)  |
| C(2)-C(3)-H(3A)   | 125.6     | B(10)-C(10)-B(6)  | 62.19(19) |
| C(4)-C(3)-H(3A)   | 125.6     | C(11)-C(10)-B(7)  | 118.5(2)  |
| C(8)-C(4)-C(5)    | 109.5(3)  | B(8)-C(10)-B(7)   | 62.17(19) |
| C(8)-C(4)-C(3)    | 110.3(2)  | B(9)-C(10)-B(7)   | 113.1(2)  |
| C(5)-C(4)-C(3)    | 103.3(2)  | B(10)-C(10)-B(7)  | 113.3(2)  |
| C(8)-C(4)-C(7)    | 110.2(2)  | B(6)-C(10)-B(7)   | 61.82(19) |
| C(5)-C(4)-C(7)    | 111.9(3)  | C(17)-C(11)-C(12) | 121.6(3)  |

|                     |           |                   |           |
|---------------------|-----------|-------------------|-----------|
| C(17)-C(11)-C(10)   | 120.5(3)  | B(12)-B(11)-H(11) | 120.3(17) |
| C(12)-C(11)-C(10)   | 117.6(3)  | B(14)-B(11)-H(11) | 118.4(17) |
| C(13)-C(12)-C(11)   | 123.3(4)  | C(18)-B(12)-B(16) | 105.1(2)  |
| C(13)-C(12)-H(12A)  | 118.4     | C(18)-B(12)-B(17) | 105.1(2)  |
| C(11)-C(12)-H(12A)  | 118.4     | B(16)-B(12)-B(17) | 60.52(19) |
| C(12)-C(13)-C(14)   | 125.6(4)  | C(18)-B(12)-B(11) | 58.90(18) |
| C(12)-C(13)-H(13A)  | 117.2     | B(16)-B(12)-B(11) | 108.1(2)  |
| C(14)-C(13)-H(13A)  | 117.2     | B(17)-B(12)-B(11) | 59.76(19) |
| C(13)-C(14)-C(15)   | 109.5(3)  | C(18)-B(12)-B(13) | 58.96(17) |
| C(13)-C(14)-H(14A)  | 109.8     | B(16)-B(12)-B(13) | 59.70(19) |
| C(15)-C(14)-H(14A)  | 109.8     | B(17)-B(12)-B(13) | 108.2(2)  |
| C(13)-C(14)-H(14B)  | 109.8     | B(11)-B(12)-B(13) | 108.1(2)  |
| C(15)-C(14)-H(14B)  | 109.8     | C(18)-B(12)-H(12) | 118.9(15) |
| H(14A)-C(14)-H(14B) | 108.2     | B(16)-B(12)-H(12) | 125.8(15) |
| C(16)-C(15)-C(14)   | 121.5(3)  | B(17)-B(12)-H(12) | 127.1(15) |
| C(16)-C(15)-H(15A)  | 119.3     | B(11)-B(12)-H(12) | 120.7(16) |
| C(14)-C(15)-H(15A)  | 119.3     | B(13)-B(12)-H(12) | 118.7(15) |
| C(15)-C(16)-C(17)   | 125.9(3)  | C(18)-B(13)-B(16) | 105.1(2)  |
| C(15)-C(16)-H(16A)  | 117.1     | C(18)-B(13)-B(20) | 105.4(2)  |
| C(17)-C(16)-H(16A)  | 117.1     | B(16)-B(13)-B(20) | 60.37(19) |
| C(11)-C(17)-C(16)   | 126.8(3)  | C(18)-B(13)-B(12) | 58.98(18) |
| C(11)-C(17)-H(17A)  | 116.6     | B(16)-B(13)-B(12) | 59.69(19) |
| C(16)-C(17)-H(17A)  | 116.6     | B(20)-B(13)-B(12) | 108.2(2)  |
| C(18)-B(11)-B(17)   | 105.4(2)  | C(18)-B(13)-B(15) | 59.12(17) |
| C(18)-B(11)-B(18)   | 105.2(2)  | B(16)-B(13)-B(15) | 108.0(2)  |
| B(17)-B(11)-B(18)   | 60.40(19) | B(20)-B(13)-B(15) | 59.78(19) |
| C(18)-B(11)-B(12)   | 59.09(18) | B(12)-B(13)-B(15) | 108.2(2)  |
| B(17)-B(11)-B(12)   | 59.91(19) | C(18)-B(13)-H(13) | 118.7(14) |
| B(18)-B(11)-B(12)   | 108.2(2)  | B(16)-B(13)-H(13) | 126.5(14) |
| C(18)-B(11)-B(14)   | 58.77(18) | B(20)-B(13)-H(13) | 126.6(14) |
| B(17)-B(11)-B(14)   | 108.0(2)  | B(12)-B(13)-H(13) | 119.4(14) |
| B(18)-B(11)-B(14)   | 59.7(2)   | B(15)-B(13)-H(13) | 119.9(14) |
| B(12)-B(11)-B(14)   | 107.9(2)  | C(18)-B(14)-B(19) | 105.6(2)  |
| C(18)-B(11)-H(11)   | 117.8(16) | C(18)-B(14)-B(18) | 105.4(2)  |
| B(17)-B(11)-H(11)   | 127.9(16) | B(19)-B(14)-B(18) | 60.49(19) |
| B(18)-B(11)-H(11)   | 126.5(16) | C(18)-B(14)-B(15) | 59.38(18) |

|                   |           |                   |           |
|-------------------|-----------|-------------------|-----------|
| B(19)-B(14)-B(15) | 59.78(19) | C(27)-B(16)-H(16) | 120.5(14) |
| B(18)-B(14)-B(15) | 108.3(2)  | B(12)-B(16)-H(16) | 125.7(14) |
| C(18)-B(14)-B(11) | 58.90(18) | B(13)-B(16)-H(16) | 123.8(14) |
| B(19)-B(14)-B(11) | 108.3(2)  | B(20)-B(16)-H(16) | 118.5(14) |
| B(18)-B(14)-B(11) | 59.87(19) | B(17)-B(16)-H(16) | 121.8(14) |
| B(15)-B(14)-B(11) | 108.4(2)  | C(27)-B(17)-B(11) | 105.6(2)  |
| C(18)-B(14)-H(14) | 118.8(16) | C(27)-B(17)-B(12) | 105.3(2)  |
| B(19)-B(14)-H(14) | 125.9(17) | B(11)-B(17)-B(12) | 60.33(19) |
| B(18)-B(14)-H(14) | 126.5(17) | C(27)-B(17)-B(16) | 58.95(17) |
| B(15)-B(14)-H(14) | 119.1(17) | B(11)-B(17)-B(16) | 107.9(2)  |
| B(11)-B(14)-H(14) | 120.2(17) | B(12)-B(17)-B(16) | 59.57(19) |
| C(18)-B(15)-B(19) | 105.0(2)  | C(27)-B(17)-B(18) | 59.16(18) |
| C(18)-B(15)-B(20) | 105.0(2)  | B(11)-B(17)-B(18) | 59.98(19) |
| B(19)-B(15)-B(20) | 60.68(19) | B(12)-B(17)-B(18) | 108.2(2)  |
| C(18)-B(15)-B(14) | 58.59(17) | B(16)-B(17)-B(18) | 108.0(2)  |
| B(19)-B(15)-B(14) | 59.75(19) | C(27)-B(17)-H(17) | 120.8(14) |
| B(20)-B(15)-B(14) | 108.1(2)  | B(11)-B(17)-H(17) | 125.6(14) |
| C(18)-B(15)-B(13) | 58.64(17) | B(12)-B(17)-H(17) | 123.9(15) |
| B(19)-B(15)-B(13) | 108.1(2)  | B(16)-B(17)-H(17) | 119.3(15) |
| B(20)-B(15)-B(13) | 59.71(19) | B(18)-B(17)-H(17) | 121.7(15) |
| B(14)-B(15)-B(13) | 107.4(2)  | C(27)-B(18)-B(14) | 105.2(2)  |
| C(18)-B(15)-H(15) | 118.9(14) | C(27)-B(18)-B(11) | 104.9(2)  |
| B(19)-B(15)-H(15) | 126.8(15) | B(14)-B(18)-B(11) | 60.39(19) |
| B(20)-B(15)-H(15) | 126.4(15) | C(27)-B(18)-B(17) | 58.66(17) |
| B(14)-B(15)-H(15) | 120.1(15) | B(14)-B(18)-B(17) | 107.9(2)  |
| B(13)-B(15)-H(15) | 119.6(15) | B(11)-B(18)-B(17) | 59.62(19) |
| C(27)-B(16)-B(12) | 105.5(2)  | C(27)-B(18)-B(19) | 59.23(18) |
| C(27)-B(16)-B(13) | 105.7(2)  | B(14)-B(18)-B(19) | 59.67(19) |
| B(12)-B(16)-B(13) | 60.61(19) | B(11)-B(18)-B(19) | 108.0(2)  |
| C(27)-B(16)-B(20) | 59.24(18) | B(17)-B(18)-B(19) | 108.0(2)  |
| B(12)-B(16)-B(20) | 108.7(2)  | C(27)-B(18)-H(18) | 118.9(16) |
| B(13)-B(16)-B(20) | 60.13(19) | B(14)-B(18)-H(18) | 127.0(16) |
| C(27)-B(16)-B(17) | 58.78(17) | B(11)-B(18)-H(18) | 126.2(16) |
| B(12)-B(16)-B(17) | 59.91(19) | B(17)-B(18)-H(18) | 119.3(16) |
| B(13)-B(16)-B(17) | 108.4(2)  | B(19)-B(18)-H(18) | 120.2(16) |
| B(20)-B(16)-B(17) | 108.3(2)  | C(27)-B(19)-B(14) | 105.0(2)  |

|                   |           |                     |           |
|-------------------|-----------|---------------------|-----------|
| C(27)-B(19)-B(15) | 105.2(2)  | B(14)-C(18)-B(12)   | 113.2(2)  |
| B(14)-B(19)-B(15) | 60.47(19) | B(11)-C(18)-B(12)   | 62.01(19) |
| C(27)-B(19)-B(18) | 58.84(18) | B(13)-C(18)-B(12)   | 62.05(19) |
| B(14)-B(19)-B(18) | 59.84(19) | C(19)-C(18)-B(15)   | 119.9(2)  |
| B(15)-B(19)-B(18) | 108.4(2)  | B(14)-C(18)-B(15)   | 62.03(19) |
| C(27)-B(19)-B(20) | 58.79(17) | B(11)-C(18)-B(15)   | 113.3(2)  |
| B(14)-B(19)-B(20) | 108.0(2)  | B(13)-C(18)-B(15)   | 62.24(19) |
| B(15)-B(19)-B(20) | 59.87(19) | B(12)-C(18)-B(15)   | 113.2(2)  |
| B(18)-B(19)-B(20) | 107.9(2)  | C(20)-C(19)-C(23)   | 109.5(2)  |
| C(27)-B(19)-H(19) | 118.7(16) | C(20)-C(19)-C(18)   | 126.6(2)  |
| B(14)-B(19)-H(19) | 125.4(16) | C(23)-C(19)-C(18)   | 123.8(2)  |
| B(15)-B(19)-H(19) | 127.8(16) | C(19)-C(20)-C(21)   | 108.9(2)  |
| B(18)-B(19)-H(19) | 117.5(16) | C(19)-C(20)-H(20A)  | 125.6     |
| B(20)-B(19)-H(19) | 121.6(16) | C(21)-C(20)-H(20A)  | 125.6     |
| C(27)-B(20)-B(13) | 104.9(2)  | C(25)-C(21)-C(20)   | 111.4(2)  |
| C(27)-B(20)-B(15) | 105.1(2)  | C(25)-C(21)-C(22)   | 111.2(2)  |
| B(13)-B(20)-B(15) | 60.50(19) | C(20)-C(21)-C(22)   | 102.9(2)  |
| C(27)-B(20)-B(16) | 58.76(18) | C(25)-C(21)-C(24)   | 108.5(2)  |
| B(13)-B(20)-B(16) | 59.50(19) | C(20)-C(21)-C(24)   | 111.0(2)  |
| B(15)-B(20)-B(16) | 107.9(2)  | C(22)-C(21)-C(24)   | 111.9(2)  |
| C(27)-B(20)-B(19) | 59.02(18) | C(23)-C(22)-C(26)   | 128.7(3)  |
| B(13)-B(20)-B(19) | 107.7(2)  | C(23)-C(22)-C(21)   | 107.8(2)  |
| B(15)-B(20)-B(19) | 59.44(19) | C(26)-C(22)-C(21)   | 123.5(2)  |
| B(16)-B(20)-B(19) | 107.7(2)  | C(22)-C(23)-C(19)   | 110.7(2)  |
| C(27)-B(20)-H(20) | 119.6(16) | C(22)-C(23)-H(23A)  | 124.6     |
| B(13)-B(20)-H(20) | 125.3(16) | C(19)-C(23)-H(23A)  | 124.6     |
| B(15)-B(20)-H(20) | 126.9(16) | C(21)-C(24)-H(24A)  | 109.5     |
| B(16)-B(20)-H(20) | 118.8(16) | C(21)-C(24)-H(24B)  | 109.5     |
| B(19)-B(20)-H(20) | 121.5(16) | H(24A)-C(24)-H(24B) | 109.5     |
| C(19)-C(18)-B(14) | 119.5(2)  | C(21)-C(24)-H(24C)  | 109.5     |
| C(19)-C(18)-B(11) | 117.8(2)  | H(24A)-C(24)-H(24C) | 109.5     |
| B(14)-C(18)-B(11) | 62.3(2)   | H(24B)-C(24)-H(24C) | 109.5     |
| C(19)-C(18)-B(13) | 118.5(2)  | N(2)-C(25)-C(21)    | 178.2(3)  |
| B(14)-C(18)-B(13) | 113.2(2)  | C(22)-C(26)-H(26A)  | 109.5     |
| B(11)-C(18)-B(13) | 113.1(2)  | C(22)-C(26)-H(26B)  | 109.5     |
| C(19)-C(18)-B(12) | 117.3(2)  | H(26A)-C(26)-H(26B) | 109.5     |

|                     |           |                     |          |
|---------------------|-----------|---------------------|----------|
| C(22)-C(26)-H(26C)  | 109.5     | C(28)-C(29)-C(30)   | 126.6(3) |
| H(26A)-C(26)-H(26C) | 109.5     | C(28)-C(29)-H(29A)  | 116.7    |
| H(26B)-C(26)-H(26C) | 109.5     | C(30)-C(29)-H(29A)  | 116.7    |
| C(28)-C(27)-B(17)   | 118.6(2)  | C(31)-C(30)-C(29)   | 124.7(3) |
| C(28)-C(27)-B(16)   | 119.1(2)  | C(31)-C(30)-H(30A)  | 117.6    |
| B(17)-C(27)-B(16)   | 62.28(19) | C(29)-C(30)-H(30A)  | 117.6    |
| C(28)-C(27)-B(18)   | 118.3(2)  | C(30)-C(31)-C(32)   | 120.8(3) |
| B(17)-C(27)-B(18)   | 62.18(19) | C(30)-C(31)-H(31A)  | 119.6    |
| B(16)-C(27)-B(18)   | 113.2(2)  | C(32)-C(31)-H(31A)  | 119.6    |
| C(28)-C(27)-B(20)   | 118.7(2)  | C(31)-C(32)-C(33)   | 107.3(3) |
| B(17)-C(27)-B(20)   | 113.4(2)  | C(31)-C(32)-H(32A)  | 110.3    |
| B(16)-C(27)-B(20)   | 62.00(19) | C(33)-C(32)-H(32A)  | 110.3    |
| B(18)-C(27)-B(20)   | 113.3(2)  | C(31)-C(32)-H(32B)  | 110.3    |
| C(28)-C(27)-B(19)   | 118.5(2)  | C(33)-C(32)-H(32B)  | 110.3    |
| B(17)-C(27)-B(19)   | 113.1(2)  | H(32A)-C(32)-H(32B) | 108.5    |
| B(16)-C(27)-B(19)   | 112.9(2)  | C(34)-C(33)-C(32)   | 122.1(3) |
| B(18)-C(27)-B(19)   | 61.93(19) | C(34)-C(33)-H(33A)  | 119.0    |
| B(20)-C(27)-B(19)   | 62.19(19) | C(32)-C(33)-H(33A)  | 119.0    |
| C(29)-C(28)-C(34)   | 122.6(3)  | C(33)-C(34)-C(28)   | 124.0(3) |
| C(29)-C(28)-C(27)   | 120.1(2)  | C(33)-C(34)-H(34A)  | 118.0    |
| C(34)-C(28)-C(27)   | 116.9(2)  | C(28)-C(34)-H(34A)  | 118.0    |

---

Symmetry transformations used to generate equivalent atoms:

**Table 5.** Anisotropic displacement parameters ( $\text{\AA}^2 \times 10^3$ ) for **8**. The anisotropic displacement factor exponent takes the form:  $-2\pi^2 [ h^2 a^{*2} U_{11} + \dots + 2 h k a^* b^* U_{12} ]$

|       | U11   | U22   | U33   | U23    | U13   | U12    |
|-------|-------|-------|-------|--------|-------|--------|
| B(1)  | 37(2) | 21(2) | 31(2) | -1(2)  | 7(2)  | 7(2)   |
| B(2)  | 25(2) | 33(2) | 29(2) | 7(2)   | 5(1)  | 8(2)   |
| B(3)  | 24(2) | 29(2) | 28(2) | -2(2)  | 4(1)  | -1(2)  |
| B(4)  | 30(2) | 21(2) | 22(2) | 2(1)   | 2(1)  | 3(1)   |
| B(5)  | 27(2) | 31(2) | 24(2) | -5(2)  | 2(1)  | 0(2)   |
| B(6)  | 29(2) | 29(2) | 25(2) | 2(2)   | 1(1)  | 8(2)   |
| B(7)  | 31(2) | 23(2) | 26(2) | 0(1)   | 7(1)  | 0(2)   |
| B(8)  | 26(2) | 36(2) | 22(2) | 4(2)   | 5(1)  | 2(2)   |
| B(9)  | 32(2) | 28(2) | 29(2) | 5(2)   | 6(2)  | 10(2)  |
| B(10) | 33(2) | 27(2) | 28(2) | -5(2)  | 7(2)  | 1(2)   |
| C(1)  | 26(2) | 20(2) | 22(1) | 0(1)   | 1(1)  | 3(1)   |
| C(2)  | 25(2) | 20(2) | 22(1) | -3(1)  | 2(1)  | 3(1)   |
| C(3)  | 35(2) | 41(2) | 23(2) | 2(1)   | 1(1)  | 7(2)   |
| C(4)  | 26(2) | 34(2) | 34(2) | 2(1)   | 6(1)  | 2(1)   |
| C(5)  | 37(2) | 28(2) | 32(2) | 3(1)   | 6(1)  | -6(1)  |
| C(6)  | 29(2) | 34(2) | 34(2) | 3(1)   | 0(1)  | -1(1)  |
| C(7)  | 37(2) | 31(2) | 51(2) | -7(2)  | 4(2)  | 2(2)   |
| C(8)  | 38(2) | 26(2) | 36(2) | 8(1)   | 10(2) | -3(2)  |
| C(9)  | 34(2) | 57(2) | 40(2) | 11(2)  | 5(2)  | -8(2)  |
| N(1)  | 48(2) | 33(2) | 49(2) | 5(1)   | 21(1) | 4(1)   |
| C(10) | 25(2) | 24(2) | 24(2) | 1(1)   | 2(1)  | 4(1)   |
| C(11) | 32(2) | 29(2) | 25(2) | -2(1)  | 4(1)  | 2(1)   |
| C(12) | 41(2) | 63(2) | 50(2) | 31(2)  | 19(2) | 22(2)  |
| C(13) | 77(3) | 77(3) | 74(3) | 32(2)  | 43(2) | 49(3)  |
| C(14) | 71(3) | 59(3) | 69(3) | -25(2) | 50(2) | -31(2) |
| C(15) | 42(2) | 72(3) | 30(2) | 5(2)   | 0(2)  | -12(2) |
| C(16) | 41(2) | 43(2) | 35(2) | 11(2)  | -2(2) | -4(2)  |
| C(17) | 30(2) | 33(2) | 32(2) | 5(1)   | 4(1)  | 2(1)   |
| B(11) | 41(2) | 25(2) | 22(2) | 4(2)   | 8(2)  | 10(2)  |
| B(12) | 24(2) | 33(2) | 25(2) | -8(2)  | 1(1)  | -1(2)  |

|       |       |       |       |        |       |        |
|-------|-------|-------|-------|--------|-------|--------|
| B(13) | 30(2) | 19(2) | 30(2) | 2(2)   | 8(2)  | 1(1)   |
| B(14) | 36(2) | 22(2) | 26(2) | -5(2)  | 10(2) | -8(2)  |
| B(15) | 25(2) | 35(2) | 23(2) | 6(2)   | -2(1) | 1(2)   |
| B(16) | 28(2) | 24(2) | 30(2) | -7(2)  | 7(2)  | -6(2)  |
| B(17) | 30(2) | 33(2) | 22(2) | -2(2)  | 1(1)  | 6(2)   |
| B(18) | 41(2) | 21(2) | 24(2) | 1(1)   | 12(2) | -1(2)  |
| B(19) | 27(2) | 35(2) | 21(2) | -4(2)  | 3(1)  | -8(2)  |
| B(20) | 28(2) | 27(2) | 32(2) | 7(2)   | 5(2)  | 4(2)   |
| C(18) | 25(2) | 16(1) | 20(1) | 1(1)   | 1(1)  | -3(1)  |
| C(19) | 24(2) | 18(1) | 19(1) | 1(1)   | 1(1)  | 4(1)   |
| C(20) | 28(2) | 22(2) | 25(2) | -4(1)  | 4(1)  | 1(1)   |
| C(21) | 27(2) | 22(2) | 22(1) | 1(1)   | 3(1)  | 4(1)   |
| C(22) | 25(2) | 22(2) | 25(2) | -1(1)  | -3(1) | 4(1)   |
| C(23) | 27(2) | 20(2) | 30(2) | -2(1)  | 2(1)  | -1(1)  |
| C(24) | 27(2) | 29(2) | 28(2) | 0(1)   | -1(1) | 2(1)   |
| C(25) | 24(2) | 25(2) | 28(2) | -4(1)  | 2(1)  | 1(1)   |
| N(2)  | 38(2) | 35(2) | 36(2) | 7(1)   | 3(1)  | 0(1)   |
| C(26) | 31(2) | 32(2) | 25(2) | -4(1)  | 0(1)  | 1(1)   |
| C(27) | 27(2) | 17(1) | 21(1) | -1(1)  | 0(1)  | -3(1)  |
| C(28) | 26(2) | 25(2) | 21(1) | 2(1)   | 2(1)  | 0(1)   |
| C(29) | 31(2) | 34(2) | 26(2) | -4(1)  | 4(1)  | -5(1)  |
| C(30) | 35(2) | 41(2) | 24(2) | -8(1)  | 2(1)  | 0(2)   |
| C(31) | 33(2) | 46(2) | 24(2) | -3(2)  | 1(1)  | 8(2)   |
| C(32) | 46(2) | 48(2) | 38(2) | 13(2)  | 22(2) | 8(2)   |
| C(33) | 45(2) | 36(2) | 66(3) | -17(2) | 30(2) | -16(2) |
| C(34) | 34(2) | 41(2) | 37(2) | -18(2) | 11(1) | -12(2) |

---
